# Supplementary material for: The high stakes of early motherhood: insights from Nepal's teenage pregnancy crisis
Source: Research Square preprint supplement (doi:10.21203/rs.3.rs-6462941/v1), 2025-04-21
Supplement: Supplementary file 1 [file b311df9f50ed9a42919ec0c0.docx]

Additional figure 1: Chronological policy trajectory of adolescents' sexual and reproductive health and rights in Nepal, 2025

2017

National Civil Code
