# Supplementary material for: The high stakes of early motherhood: insights from Nepal's teenage pregnancy crisis
Source: Research Square preprint supplement (doi:10.21203/rs.3.rs-6462941/v1), 2025-04-21
Supplement: Supplementary file 2 [file dcf4277480d921c07f7bc2bd.docx]

Additional Table 1: Adolescent Sexual and Reproductive Health focuses on government documents (constitutions, acts, order, policies, and Strategy) in Nepal.

| **Policy Documents** | **Policy descriptions** |
| --- | --- |
| Health Policy 1991[ 32] | Mandated to expand basic healthcare services by increasing the number of health posts to ensure primary healthcare access for all, including family planning and maternal and child health services. However, it did not focus on adolescent and reproductive health at the time[ 32]. |
| National Reproductive Health Strategy 1998 [2]. | The 1998 Strategy was inspired by the International Conference on Population and Development (ICPD) held in 1994. Nepal’s National Reproductive Health Strategy, developed in 1998 as the country’s first Strategy of its kind, was a pioneering effort that included Adolescent Sexual and Reproductive Health as a key component [2]. The Strategy was mandated to promote adolescents' health and socio-economic status through various measures, including raising the legal age of marriage and reducing adolescent pregnancy rates. |
| National Adolescent Health and Development Strategy 2000 [3] | The Adolescent Health and Development Strategy 2000 was Nepal’s first dedicated policy framework to improve adolescents' health and well-being. The Strategy introduced a more focused and comprehensive approach to addressing adolescents' health needs and expanded focus beyond reproductive health, such as life skills education, mental health, etc. [3]. Following the Strategy, the GoN launched a national program 2010 to provide adolescent-friendly sexual and reproductive health services as part of its five-year health sector plans [4]. |
| The Constitution of Nepal 2015 [5]. | The constitution of Nepal (2015) ensures the right to equality (Article 18) and the right to reproductive health (Article 38), and law became effective on September 2015 [5]. It ensures free access to SRH services and promotes family planning and adolescent-friendly services. It also prohibits child marriage (Article 39) and protects adolescents from child marriage. |
| National Civil Code, 2017 [6] | As per section 70 (1) (d) of National Civil Code, 2017, the minimum age for marriage was upgraded to 20 and included the provision of a one-year jail sentence and/ or a fine of Nepalese Rupees (NRs) 10,000 (USD 74.90) for anyone found guilty [6]. |
| National Safe Motherhood and Reproductive Health Act 2018 [7]. | Nepal’s Safe Motherhood and Reproductive Health Act 2018 is committed to realizing rights and choices for all [7]. Mandated to ensure adolescents access to reproductive health services including contraception, safe abortion and youth-friendly care. The Act also guarantees confidential and non-discriminatory services for adolescents. |
| Adolescents Health and Development Strategy 2018 [3] | Nepal's Adolescent Health and Development Strategy in 2018 was amended to address emerging health issues and align with Sustainable Development Goals[3].  Focuses on reducing teenage pregnancy through Comprehensive sexuality education, improved access to adolescent-friendly reproductive health services, and community awareness programs addressing social determinants like early marriage. |
| National Health Policy 2019 [8] | The policy mandates to address adolescent sexual and reproductive health, ensuring better health outcomes for adolescents. The policy emphasizes establishing adolescent-friendly health services, which include providing sexual and reproductive health education, counseling and services specifically tailored to the needs of young people. The policy also calls for strengthening laws and regulations to protect adolescents from early and forced marriages, a key factor contributing to teenage pregnancies. |
| Nepal Health Sector Strategy 2016-2021 and 2022-2030 [9,10]. | The Strategy emphasizes integrating adolescent sexual and reproductive health services with other health services, adopting a holistic approach to adolescent health. It also aims to reduce the fertility rate by 2030 [9,10]. |

**Reference**

1. His Majesty Government of Nepal M of H and P. Nepal National Health Policy, 1991. 2000. Available: http://www.mohp.gov.np/app/webroot/upload/files/National Health Policy-1991.pdf

2. Government of Nepal, Ministry of Health D of HS. Adolescent Sexual and Reproductive Health Programme to Address Equity, Social Determinants, Gender and Human Rights in Nepal, Report of the Pilot Project. 2017. Available: https://un.org.np/resource/adolescent-sexual-and-reproductive-health-programme-address-equity-social-determinants

3. Department of Health Services. National Adolescent Health and Development Strategy (Unofficial Translation). 2018. Available: https://fwd.gov.np/asrh/

4. Sugawara E, Nikaido H. Properties of AdeABC and AdeIJK efflux systems of Acinetobacter baumannii compared with those of the AcrAB-TolC system of Escherichia coli. Antimicrob Agents Chemother. 2014;58: 7250–7257. doi:10.1128/AAC.03728-14

5. GoN 2015. The Constitution of Nepal. Nepal Gazette 2015 pp. 1–226. Available: https://lawcommission.gov.np/en/?s=constitutional+of+Nepal

6. Statements P, Authority P. The National Civil ( Code ) Act , 2017 ( 2074 ). 2017. Available: https://lawcommission.gov.np

7. Nepal Law Commission. The Right to Safe Motherhood and Reproductive Health Act, 2018. 9–2075 Nepal; 2018. Available: https://lawcommission.gov.np

8. Ministry of Health and Population. National Health Policy 2019 (Unofficial Translation). Kathmandu, Nepal; 2019. Available: https://dohs.gov.np/national-health-policy-2074/

9. Governement of Nepal. Nepal Health Sector Strategy.Ministry of Health and Population, Kathmandu. 2015. Available: https://nepal.unfpa.org/en/publications/nepal-health-sector-strategy-2015-2020

10. Ministry of Health and Population. Nepal Health Sector Strategy. Nepal Heal Sect Strateg. 2015; 1–26. Available: http://nhrc.gov.np/wp-content/uploads/2017/03/Health-Research-Areas-of-Nepal-2019.pdf
